# Supplementary material for: Construction and Activity Study of a Natural Antibacterial Patch Based on Natural Active Substance-Green Porous Structures
Source: MDPI journal article supplement (doi:10.3390/molecules28031319), 2023-01-30
Supplement: s1 [file s1]

Supplementary Materials

# Construction and Activity Study of a Natural Antibacterial Patch Based on Natural Active Substance-Green Porous Structures

Xiangfan Gao <sup>1,†</sup>, Yuan Zhou <sup>2,3,†</sup>, Jinhui Gu <sup>1</sup>, Xiping Liu <sup>4</sup> and Zhijun Zhang <sup>1,\*</sup>

<sup>1</sup> Department of Chemistry, Key Laboratory of Surface & Interface Science of Polymer Materials of Zhejiang Province, Zhejiang Sci-Tech University, Hangzhou 310018, China

<sup>2</sup> Department of Pharmacy, Taihe Hospital, Hubei University of Medicine, Shiyan 44200, China

<sup>3</sup> College of Pharmacy, Hubei University of Traditional Chinese Medicine, Wuhan 430065, China

<sup>4</sup> School of Pharmaceutical Science, University of South China, Hengyang 421001, China

\* Correspondence: zjzhang@zstu.edu.cn

† These authors contributed equally to this work.

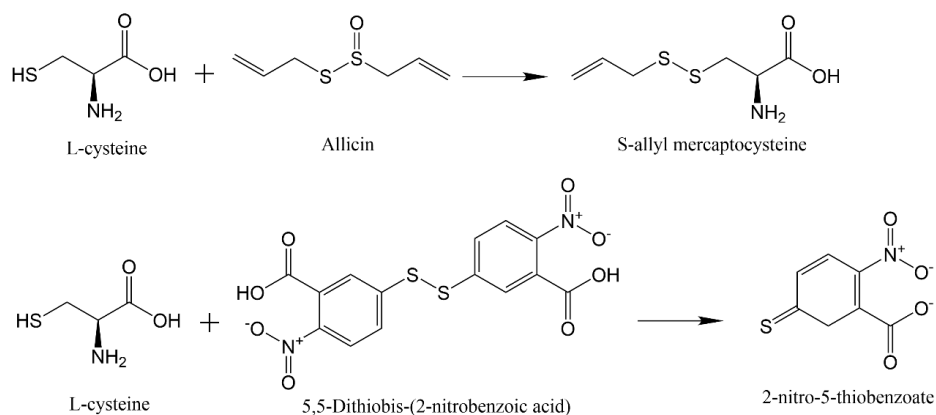

**Figure S1.** NTB is the reaction process of detecting allicin content by the signal substrate.

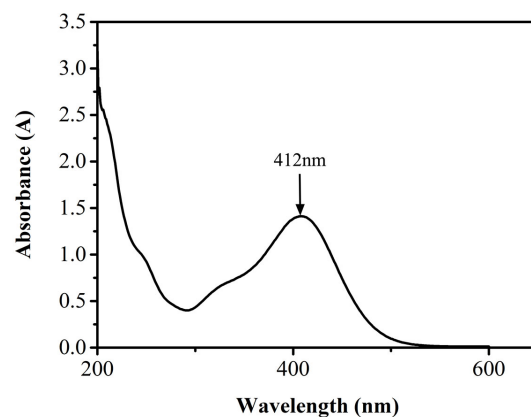

**Figure S2.** UV-vis absorption of NTB.

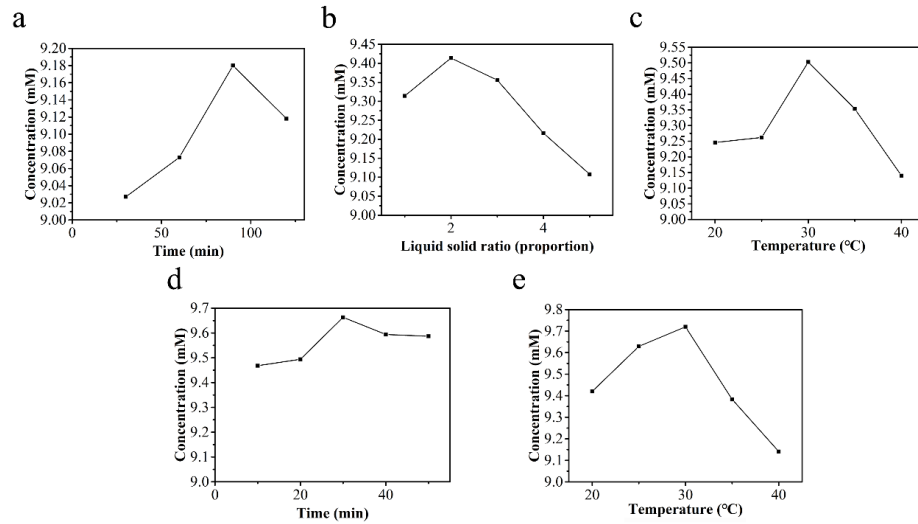

**Figure S3.** Optimal conditions for extracting allicin. (a) Different extraction times with extraction temperature was 35 °C, the enzymolysis time was 30 min, the liquid-solid ratio was 5, and the enzymolysis temperature was 35 °C. (b) Different liquid-solid ratios (m/m) with extraction time were 60 min, the extraction temperature was 35 °C, the enzymolysis time was 30 min, and the enzymolysis temperature was 35 °C. (c) Different enzymatic hydrolysis temperatures with extraction time were 60 min, the extraction temperature was 35 °C, the enzymolysis time was 30 min, the liquid-solid ratio was 5, and the enzymolysis temperature was 35 °C. (d) Different enzymatic hydrolysis times with extraction time was 60 min, the extraction temperature was 35 °C, the liquid-solid ratio was 5, and the enzymolysis temperature was 35 °C. (e) Different extraction temperatures with extraction time were 60 min, the enzymolysis time was 30 min, the liquid-solid ratio was 5, and the enzymolysis temperature was 35 °C.

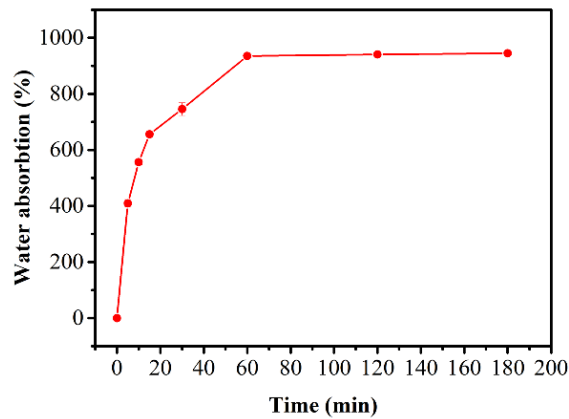

**Figure S4.** Water absorption of the antibacterial patches.

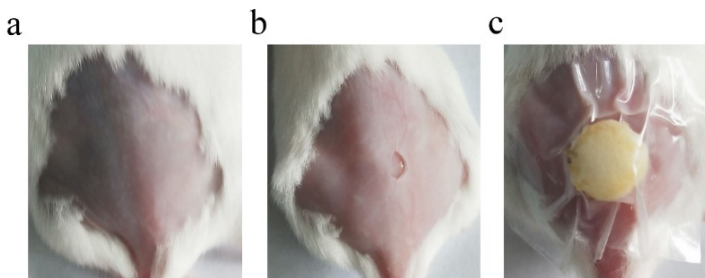

**Figure S5.** Photographs of the process of establishing a mice wound model. (a) Photographs of shaved mice. (b) Photographs of mice injected with *B. subtilis*. (c) Mice with "Antibacterial patches".
